**Study Title: HIV self-testing and its associated factors among young university students:  
A cross-sectional study in a Public University in Uganda**

**Authors.**

Winnie Nambi<sup>1</sup>, Rose Chalo Nabirye<sup>1</sup>, Gloria Nakato<sup>1</sup>, Mary Aleni<sup>2</sup>; Joshua Eputai<sup>1</sup>

**Author Affiliations**

1. Department of Nursing, Faculty of Health Sciences, Busitema University, P.O. Box 1460, Mbale, Uganda.
2. Department of Nursing and Midwifery, Faculty of Health Sciences, Muni University.

\*Corresponding author: e-mail: [joshuaepuitai@gmail.com](mailto:joshuaepuitai@gmail.com)

**Abstract**

**Introduction:** Uptake of HIV testing services is sub-optimal among young adults. HIV self-testing offers opportunities to improve uptake of HIV testing services among young adults. The study was conducted to determine preferences of HIV testing, uptake of HIV self-testing and the factors associated with HIV-self testing among young adults.

**Methods:** The study was a descriptive cross-sectional design. A self-administered questionnaire for data collection. We interviewed 384 university students to collect information about HIV testing and their preferences. Logistic regression analysis was used to determine the factors associated with HIV self-testing. The study obtained ethical clearance from the Mbale Regional Referral Hospital Research and Ethics Committee.

**Results:** The median age of the participants was 24 (interquartile range: 22-28). Uptake of HIV self-testing was 55% among young adults. Similarly, 56% of the young adults preferred HIV self-testing over facility-based HIV testing in the future. Privacy (46%), confidentiality (7%) and convenience (32%) were the most common reasons given for preferring HIV self-testing.

Participants who preferred to test in the healthcare facility cited preference for counselling

**NOTE: This preprint reports new research that has not been certified by peer review and should not be used to guide clinical practice.**

services (21%) and the perception that the HIV test results from the healthcare facility were more accurate (37%), credible and trustworthy (21%). HIV self-testing was significantly associated with several factors: increasing age (95% CI: 0.89 (0.80-0.98)), fourth year of study (95%CI: 2.90 (1.01-8.31)), students of anaesthesia program (95% CI: 0.40 (0.17-0.95)), Muslim religion (95% CI: 0.07 (0.01-0.41)), consistent use of condoms (95% CI: 0.36 (0.15-0.88)), and having multiple sexual partners (95% CI: 3.22 (1.49-7.00)).

**Conclusion:** Young adults preferred HIV self-testing over provider-based testing in the health facility. This preference was related to privacy, confidentiality and convenience. Addressing concerns about accuracy of test results in HIV self-testing and need for counselling services may improve uptake of HIV self-testing among young adults.

**Keywords:** HIV self-testing, preferences, HIV, Uganda & young adults

## 1 **Background**

2 In Uganda, an estimated 1.4 million people are living with Human Immunodeficiency Virus  
3 (HIV) [1]. Young adults, especially adolescent girls, are disproportionately affected with a  
4 high risk of acquiring new HIV infections [2]. In 2023, an estimated 52,000 new HIV  
5 infections were reported in Uganda of which 36% were among people between the age of 15-  
6 24 years [1]. The AIDS- related deaths in Uganda were estimated at about 17,000 annually  
7 [1]. The 95-95-95 strategy is critical in eliminating HIV transmission by 2030 as in the  
8 sustainable development goals [3]. This strategy involves ensuring that 95% of people living  
9 with HIV (PLHIV) are aware of their HIV status, 95% of the PLHIV are on highly active  
10 antiretroviral therapy (HAART), and 95% of PLHIV on HAART have achieved viral load  
11 suppression [4].

12 HIV testing enables individuals to adopt prevention practices that reduce HIV transmission  
13 [4]. This ensures that PLHIV are aware of their status, thus facilitating early initiation on  
14 HAART [4]. Consequently, HIV testing helps improve quality of life for PLHIV and it also  
15 reduces AIDS related mortality [5]. Despite the critical role of HIV testing in reducing the  
16 burden of HIV, it is still suboptimal, especially among young adults [6]. In Nigeria, only  
17 24% of adolescents and young adults had ever tested for HIV [5]. Furthermore, HIV testing  
18 in sub-Saharan Africa was least likely among young adults who were living with HIV, and  
19 therefore, were unaware of their HIV positive status [6]. HIV testing rates in Uganda were  
20 lowest among young adults 15-24 years than any other age groups [7].

21 The traditional HIV testing services, especially voluntary counselling and testing and  
22 provider-initiated HIV counselling and testing, have not significantly improved uptake of  
23 HIV testing services in sub-Saharan Africa [6]. Stigma, provider bias, lack of access, and  
24 concerns of privacy have affected uptake of HIV services among young adults [5,6]. The new  
25 HIV testing technologies and approaches such as HIV self-testing offers opportunities to

26 improve uptake of HIV testing services [6]. HIV self-testing (HIVST) can occur in different  
27 forms where individuals can test at home, using oral or blood testing kits, and can access  
28 counselling services from trained healthcare professionals over the phone [8]. Individuals  
29 with positive HIV tests results after HIV home self-testing can be linked to counselling and  
30 receive further care in the healthcare facilities [9].

31 Young adults tend to have higher preference and acceptability of HIVST options [8,10]. In  
32 Nigeria, the majority (49%) of young adults preferred blood-based HIVST than the 44% who  
33 preferred facility-based HIV testing and oral HIVST [8]. In Uganda, 95% of university  
34 female students were willing to use HIVST [11]. HIVST addresses youth-specific barriers  
35 inherent in the traditional HIV testing services as it fosters respect, privacy, convenience,  
36 confidentiality and comfort [10,12]. In Uganda, a limited number of studies, to the best of our  
37 knowledge, have explored HIVST preferences among young adults [11,13]. Therefore, this  
38 study was conducted to determine the preferences for HIVST, uptake of HIVST and its  
39 associated factors associated among young adults in a public University.

## 40 **Methods and materials**

### 41 **Study design and setting**

42 We used a cross-sectional study to determine the HIVST preferences and practices among  
43 young adults. The study was conducted in Busitema University, Faculty of Health Sciences.  
44 This public university attracts a large number of students from different socioeconomic,  
45 cultural, and religious backgrounds. The Faculty of Health Sciences is located in Eastern  
46 Uganda, where it offers undergraduate and postgraduate programs. The undergraduate  
47 programs are in nursing, anaesthesia, medicine and surgery, while postgraduate programs are  
48 in the area of public health and master of medicine programs.

## 49 **Study population**

50 The study population was comprised of young university students in the Faculty of Health  
51 Science who were pursuing clinical disciplines. We used consecutive sampling to select the  
52 participants for the study. The sample size, determined using the Kish-Leslie formular, was  
53 384. This represented 85% of the student population in the Faculty of Health Sciences.

## 54 **Data collection tool**

55 We used a self-administered questionnaire for data collection. Data was collected between 01<sup>st</sup>  
56 November 2022 to 31<sup>st</sup> December 2022. Participants filled the questionnaires designed on the  
57 Kobo toolbox. The questionnaire had sections for socio-demographic, sexual behaviours, and  
58 HIV testing practices (Appendix 1). The questionnaire had an open-ended question on the  
59 challenges that participants face while seeking HIV testing services, and the reasons for  
60 preferring HIVST or provider-based testing in the facilities.

## 61 **Study variables**

62 The dependent variable in the study was HIV self-testing which was considered in individuals  
63 who tested themselves at home in the first sexual encounter with a new or current partner.  
64 Additionally, participants were asked about their preferences for HIV testing (self-testing at  
65 home or healthcare provider testing in the healthcare facility) if they were to enter into a new  
66 relationship in the future.

67 The independent variables included age, gender, marital status, employment status  
68 (employed/unemployed), year of study, program of study, religion, sexual risk behaviors, and  
69 HIV testing practices. The sexual risk behaviors included number of sexual partners in the last  
70 12 months, age at sex debut, inconsistent use of condoms, non-disclosure of HIV status, broken  
71 condoms, and whether they were sexually active. HIV testing practices investigated were ever  
72 testing for HIV, number of times HIV was tested, and HIV testing at the last sexual encounter.

73 **Data analysis**

74 Data was analysed using STATA version 15 software. The open-ended questions on reasons  
75 for preferring self-testing or provider-based testing were coded and labelled into categories.  
76 Categorical variables were analysed through use of frequencies and percentages, while median  
77 and interquartile range was used to describe continuous variables not normally distributed.  
78 Logistic regression at bivariate and multivariate level was used to determine the factors  
79 associated with HIV self-testing among university students. The probability value (p-value) of  
80 less than 5% indicated significant association, while the 95% confidence level (CI) was used  
81 to infer the magnitude of association. P-values which were less than 0.2 at the bivariate level  
82 and variables relevant to HIV self-testing were included in the multivariate logistic regression  
83 model. Factors associated with HIV self-testing were those that were significant at the p-value  
84 of less than 0.05 at the multivariate logistic regression.

85 **Ethical consideration**

86 The Mbale Regional Referral Hospital (MRRH) Research and Ethics Committee (MRRH-  
87 2022-212) provided ethical clearance for the study. A written informed consent was obtained  
88 from all the study participants. Privacy was observed through sending participants an  
89 anonymised link to the questionnaire instead of the face-to-face interview where information  
90 from the participants could be identified. The filled information was confidential, while  
91 measures were put in place to maintain confidentiality.

92

93

94

95

96

97 **Results**

98 **Description of study participants.**

99 The median age of the participants was 24 (interquartile range of 22-28 years), while the mean  
100 age at sex debut was 19.6 (standard deviation of 2.56) (Table 1). More than a half of the  
101 participants had two or more partners in the last year (55%), while 61% of the participants had  
102 sex with a partner of unknown HIV status.

103 **Table 1: Description of the study participants**

| <b>Variable</b>                  | <b>Frequency (percent)</b><br><b>N=384</b> |
|----------------------------------|--------------------------------------------|
| <b>Age (n=384)</b>               |                                            |
| Median (interquartile range)     | 24 (22-28)                                 |
| <b>Gender (n=384)</b>            |                                            |
| Male                             | 230 (59.9)                                 |
| Female                           | 154 (40.1)                                 |
| <b>Marital status (n=384)</b>    |                                            |
| Single                           | 242 (63.0)                                 |
| Married/cohabiting               | 142 (37.0)                                 |
| <b>Year of study</b>             |                                            |
| Year 1                           | 64 (16.7)                                  |
| Year 2                           | 92 (24.0)                                  |
| Year 3                           | 62 (16.1)                                  |
| Year 4                           | 90 (23.4)                                  |
| Year 5                           | 76 (19.8)                                  |
| <b>Program of study</b>          |                                            |
| Bachelor of Nursing              | 71 (18.5)                                  |
| Bachelor of Anaesthesia          | 70 (18.2)                                  |
| Bachelor of Medicine and Surgery | 243 (63.3)                                 |
| <b>Employment</b>                |                                            |
| Unemployed                       | 282 (73.4)                                 |

|                                                                                  |             |
|----------------------------------------------------------------------------------|-------------|
| Employed                                                                         | 102 (26.6)  |
| <b>Religion</b>                                                                  |             |
| Christian                                                                        | 362 (94.3)  |
| Moslem                                                                           | 22 (5.7)    |
| <b>Are you in any sexual relationship?</b>                                       |             |
| No                                                                               | 65 (16.9)   |
| Yes                                                                              | 319 (83.1)  |
| <b>Age at sex debut</b>                                                          |             |
| Mean (standard deviation)                                                        | 19.6 (2.56) |
| <b>Knows the HIV status of the partner in the first sexual encounter (n=320)</b> |             |
| No                                                                               | 168 (52.5)  |
| Yes                                                                              | 152 (47.5)  |
| <b>Number of partners in the past year (n=320)</b>                               |             |
| 1                                                                                | 146 (45.6)  |
| 2 or more                                                                        | 174 (54.4)  |
| <b>HIV high risky behaviours</b>                                                 |             |
| Inconsistent use of condoms                                                      | 274 (71.4)  |
| Broken condoms                                                                   | 175 (45.6)  |
| Multiple sexual partners                                                         | 171 (44.5)  |
| Sex with a person with unknown status                                            | 234 (60.9)  |
| Not disclosing the HIV status                                                    | 109 (28.4)  |

104

### 105 **HIV testing practices among young adults**

106 Almost all the study participants had ever tested for HIV (table 2). The majority (80%,

107 n=258) of the participants tested for HIV in the first sexual encounter with a new partner.

108 Among participants tested for HIV, 55% (144/260) of them opted for HIV self-testing. The

109 challenges associated with HIV testing were it being expensive or cost of testing,

110 unavailability and inaccessibility of the test kits or services.

111



112

113 **Table 2: HIV testing practices among young adults**

| <b>Variable</b>                                                                      | <b>Frequency, n=320 (percentage)</b> |
|--------------------------------------------------------------------------------------|--------------------------------------|
| <b>Ever tested for HIV</b>                                                           |                                      |
| Yes                                                                                  | 375 (97.7)                           |
| No                                                                                   | 9 (2.3)                              |
| <b>Number of times of HIV testing (n=349)</b>                                        |                                      |
| Once                                                                                 | 105 (30.1)                           |
| Multiple times                                                                       | 244 (69.9)                           |
| <b>HIV testing in the last sexual encounter</b>                                      |                                      |
| Yes                                                                                  | 206 (64.4)                           |
| No                                                                                   | 73 (22.8)                            |
| Not applicable (status known for both of us)                                         | 41 (12.8)                            |
| <b>Tested for HIV in the first sexual encounter with a new partner (n=324)</b>       |                                      |
| Yes                                                                                  | 258 (79.6)                           |
| No                                                                                   | 66 (20.4)                            |
| <b>Place of HIV testing in the first sexual encounter with a new partner (N=260)</b> |                                      |
| Home/self-testing                                                                    | 144 (55.4)                           |
| Health facility/healthcare provider testing                                          | 116 (44.6)                           |
| <b>Challenges of HIV testing</b>                                                     |                                      |
| HIV testing kits unavailable                                                         | 226 (58.8)                           |
| HIV testing expensive                                                                | 120 (31.2)                           |
| Unable to access drug store/pharmacy                                                 | 10 (2.6)                             |
| Unable to test myself                                                                | 28 (7.3)                             |

114

115 **Preferences for HIV testing options.**

116 Similar to the higher proportion of young adults who self-tested for HIV at home, more than  
 117 a half of the participants (56%, n=213) preferred to test by themselves at home if they were to  
 118 enter into new sexual relationships in the future (table 3). Privacy and convenience were the  
 119 most common reasons given for preferring HIV-self testing. Individuals who preferred  
 120 provider-based HIV testing in the health facilities did so because of concerns of accuracy of  
 121 test results and the need for pre-test and post-test counselling.

122

123

124 **Table 3: Preferences of HIV testing options**

| <b>Variable</b>                                                      | <b>Frequency, n=320 (percentage)</b> |
|----------------------------------------------------------------------|--------------------------------------|
| <b>Would you wish to test for HIV in a new relationship? (N=384)</b> |                                      |
| Yes                                                                  | 376 (97.9)                           |
| Undecided                                                            | 8 (2.1)                              |
| <b>Preferred type of HIV testing (=376)</b>                          |                                      |
| Home/self-testing                                                    | 213 (56.6)                           |
| Health facility/healthcare provider                                  | 163 (43.4)                           |
| <b>Reasons for preferring HIV self-testing (n=238)***</b>            |                                      |
| Privacy                                                              | 110 (46.2)                           |
| Convenience                                                          | 76 (31.9)                            |
| Confidentiality                                                      | 16 (6.7)                             |
| Other reasons*                                                       | 36 (15.1)                            |
| <b>Reasons for preferring health facility (n=174)***</b>             |                                      |
| Proper testing and accurate results                                  | 65 (37.3)                            |
| Trustworthy/credible/reliable results                                | 37 (21.3)                            |
| Pre and post-test counselling                                        | 36 (20.7)                            |
| Needs to be tested by healthcare provider                            | 16 (9.2)                             |
| Safety of HIV testing                                                | 12 (6.9)                             |
| Other reasons**                                                      | 8 (4.6)                              |
| <b>Preference for pre- and post-testing counselling (n=384)</b>      |                                      |
| Yes                                                                  | 331 (86.2)                           |
| No                                                                   | 53 (13.8)                            |

125 \*Other reasons (able to test on their own, saves time, cheap and mistrust of healthcare  
126 workers)

127 \*\*Other reasons (confidentiality, convenience, easier and cannot do self-test)

128 \*\*\*multiple responses

129

130

131

132

133

134

135

136

137

138

139

140

141 **Factors associated with HIV-self testing among medical/nursing students**

142 After controlling for confounders, the following factors were significantly associated with  
 143 self-testing for HIV: age, program of study, year of study, religion, number of sexual  
 144 partners, and inconsistent use of condoms (table 4). Increase in age significantly reduced the  
 145 odds of HIV self-testing by 11%. Students who were pursuing the BNA program were  
 146 significantly less likely to test for HIV at home compared to students who were pursuing the  
 147 MBChB program. Consistent use of condoms and Muslim religion significantly reduced the  
 148 odds of self-testing for HIV. Students in year four of study compared to those in year five,  
 149 and having 2 or more partners in the last year increased the odds of HIV self-testing.

150 **Table 4: Bivariate and multivariate logistic regression for factors associated with HIV**  
 151 **self-testing.**

| Variable                         | COR (95% CI)     | P-value | AOR (95% CI)     | P-Value |
|----------------------------------|------------------|---------|------------------|---------|
| <b>Age (continuous variable)</b> | 0.97 (0.92-1.01) | 0.123   | 0.89(0.80-0.98)  | 0.018   |
| <b>Gender</b>                    |                  | 0.073   |                  |         |
| Male                             | Ref              |         | Ref              |         |
| Female                           | 0.63 (0.38-1.04) |         | 0.66(0.32-1.34)  | 0.249   |
| <b>Program of study</b>          |                  |         |                  |         |
| MBChB                            | Ref              |         | Ref              |         |
| BNS                              | 1.37 (0.73-2.55) | 0.326   | 1.24 (0.51-3.02) | 0.638   |
| BNA                              | 0.89 (0.87-1.61) | 0.741   | 0.40 (0.17-0.95) | 0.039   |
| <b>Year of study</b>             |                  |         |                  |         |
| 1                                | 1.66 (0.71-3.88) | 0.240   | 0.61 (0.18-2.03) | 0.423   |
| 2                                | 1.82 (0.83-3.98) | 0.132   | 1.03 (0.36-2.98) | 0.955   |
| 3                                | 1.21 (0.52-2.77) | 0.658   | 1.02 (0.34-3.01) | 0.974   |
| 4                                | 2.57 (1.17-5.65) | 0.019   | 2.90 (1.01-8.31) | 0.048   |
| 5                                | Ref              |         | Ref              |         |
| <b>Marital status</b>            |                  |         |                  |         |
| Married/cohabiting               | Ref              |         | Ref              |         |
| Single                           | 1.16 (0.71-1.89) | 0.560   | 1.29 (0.60-2.77) | 0.517   |
| <b>Religion</b>                  |                  |         |                  |         |
| Christian                        | Ref              |         | Ref              |         |
| Muslim                           | 0.19 (0.04-0.91) | 0.038   | 0.07 (0.01-0.41) | 0.003   |
| <b>Employment</b>                |                  |         |                  |         |
| Yes                              | Ref              |         | Ref              |         |
| No                               | 1.09 (0.65-1.83) | 0.734   | 0.45 (0.18-1.16) | 0.101   |

|                                                  |                   |       |                   |       |
|--------------------------------------------------|-------------------|-------|-------------------|-------|
| <b>Age at sex debut (continuous variable)</b>    | 0.94 (0.85-1.03)  | 0.179 | 1.02 (0.89-1.19)  | 0.720 |
| <b>HIV testing at sex debut</b>                  |                   |       |                   |       |
| Yes                                              | Ref               |       | Ref               |       |
| No                                               | 1.85 (1.12-3.06)  | 0.016 | 1.49 (0.69-3.22)  | 0.307 |
| <b>Number of sex partners in the past year</b>   |                   |       |                   |       |
| ≥2                                               | 2.32 (1.40-3.85)  |       | 3.22 (1.49-7.00)  |       |
| 1                                                | Ref               | 0.001 | Ref               | 0.003 |
| <b>Disclosed HIV status</b>                      |                   |       |                   |       |
| Yes                                              | Ref               |       | Ref               |       |
| No                                               | 0.59 (0.35-0.98)  | 0.044 | 1.02 (0.47-2.22)  | 0.961 |
| <b>Inconsistent use of condoms</b>               |                   |       |                   |       |
| Yes                                              | Ref               |       | Ref               |       |
| No                                               | 0.65 (0.34-1.26)  | 0.202 | 0.36 (0.15-0.88)  | 0.024 |
| <b>Broken condoms</b>                            |                   |       |                   |       |
| Yes                                              | Ref               |       | Ref               |       |
| No                                               | 1.32 (0.81-2.17)  | 0.267 | 1.59 (0.74-3.38)  | 0.232 |
| <b>Sex with partner of unknown status</b>        |                   |       |                   |       |
| Yes                                              | Ref               |       | Ref               |       |
| No                                               | 0.56 (0.33-0.97)  | 0.040 | 1.29 (0.53-3.10)  | 0.572 |
| <b>Frequency of HIV testing in the past year</b> |                   |       |                   |       |
| 0                                                | Ref               |       | Ref               |       |
| 1                                                | 2.66 (0.72- 9.83) | 0.143 | 3.92 (0.86-17.96) | 0.078 |
| ≥2                                               | 2.94 (0.87-9.86)  | 0.081 | 3.51 (0.87-14.10) | 0.077 |

152

## 153 Discussion

154 The study was conducted to determine HIV testing preferences, uptake of HIVST and its  
155 associated factors among young adults in a public university. Overall, 55% of the young  
156 adults had tested by themselves at home which was congruent with their preferences to use  
157 HIV self-testing in the future. HIV self-testing was preferred over provider-based HIV testing  
158 because of the associated privacy and convenience linked to HIVST. These study findings  
159 should be interpreted in light of its limitations. Although we maintained anonymity in data  
160 collection, social desirability bias is likely given the sensitivity of the topic under study.  
161 Nevertheless, because we measured for both the preferences and actual behaviours in HIV  
162 self-testing, the study findings are likely to be valid. The study provides important

163 implications that can promote adoption of HIV testing approaches that can improve HIV  
164 testing among young adults. Ultimately, the improved HIV testing can contribute to the  
165 attainment of the sustainable development goals to reduce the AIDS epidemic by 2030 [3].

166 In our study, the uptake of HIV self-testing was 55% which was consistent with 56% of  
167 participants who preferred to use HIV self-testing over provider-based in the future among  
168 young adults. This highlights a congruence between preferences for HIV self-testing among  
169 young adults and their actual behaviours. The HIV self-testing in our study was higher than  
170 24% reported among university students in Central Uganda [11]. The high uptake of HIV  
171 self-testing in our study may be attributable to the study population who were medical and  
172 nursing students, and thus, had some level of knowledge regarding HIV testing.

173 The majority of young adults preferred HIV self-testing which was consistent with high  
174 preferences and acceptability for HIVST in most of the studies [11,13,14]. Qualitative studies  
175 have equally reported that young adults find HIVST services to be more preferable,  
176 acceptable, feasible and appropriate [10,12]. Contrary to our study findings, 77% of  
177 adolescents and young girls in Kenya preferred provider- aided HIV testing to HIVST  
178 probably related to low levels of literacy [15]. This highlights that one size may not fit all,  
179 and that it is critical to consider the socio-demographic profile of young adults especially  
180 their levels of literacy in promoting HIVST practices.

181 One of the major findings in our study was that young adults valued privacy and  
182 confidentiality associated with HIV self-testing. Previous studies have equally reported that  
183 young adults prefer HIV self-testing because of its privacy and confidentiality [10,16].  
184 HIVST eliminates youth-related barriers that affect uptake of HIV testing services among  
185 young adults [10,12]. Young adults face numerous barriers such as provider bias,  
186 discrimination, stigma, and negative judgement from older clients in the clinic-based HIV

187 testing all of which were not of much concern in HIVST [10]. Adolescents and young adults  
188 are able to test themselves for HIV in the privacy of their homes without judgment,  
189 discrimination or mistreatment in the health facilities [10]. The resulting confidentiality of the  
190 test results enables young adults to maintain their dignity and autonomy while accessing HIV  
191 testing services [10,13].

192 Previous studies have underscored that young adults find HIVST to be more convenient, easy  
193 to use, efficient, and that it saves time and money [16-18]. This was consistent with our study  
194 findings where young adults preferred HIVST and the majority of them used HIVST because  
195 it was more convenient for them. The convenience in HIV self-testing can enable couples to  
196 test before sex and promote safer sex practices, while it is also known to increase HIV testing  
197 across all populations including young adults [9]. The convenient self-testing can assuage the  
198 lack of youth-friendly health services which deters the majority of young adults from going to  
199 health facilities for HIV testing [10]. Furthermore, convenience in self-testing for HIV  
200 eliminates health system bottlenecks especially in a setting like Uganda where long waiting  
201 times, distant health facilities, lack of HIV testing services, and shortage of personnel can  
202 deter many young adults from testing for HIV [17].

203 Young adults in our study who preferred provider-based HIV testing over HIVST did so  
204 because testing in the health facilities were seen to provide more accurate, trustworthy,  
205 credible, and reliable test results. Although the accuracy of test results in HIVST is equivalent  
206 to that from health facility-based HIV testing [15,19], previous studies have underscored  
207 young adults' scepticism over the accuracy of test results obtained from HIVST [18,20].  
208 Concerns over accuracy in HIVST were even more pronounced in oral-based HIV test kits  
209 than in blood-based HIV test kits [21]. Therefore, it is important to address fears and  
210 scepticism regarding accuracy of results from HIVST as concerns over test accuracy may act  
211 as a deterrent for use of HIVST among young adults [17].

212 Previous studies have highlighted the lack of pre-test and post-test counselling in HIV testing  
213 as a major concern for individuals seeking HIV testing [14,17]. Our study findings were  
214 consistent with studies which cited lack of counselling as a major deterrent for uptake of  
215 HIVST [10,20]. The lack of counselling in HIVST has been suggested to result in gender-  
216 based violence, emotional distress, suicide and self-harm though evidence to that effect is  
217 currently lacking [14,18,20]. This may be because individuals who opt for HIV self-testing  
218 are informed that HIVST does not confirm the HIV status but that it serves to screen for HIV  
219 [9]. HIVST approaches that include virtual counselling by healthcare providers through the  
220 mobile telephone have been suggested to meet the needs of young adults to access  
221 counselling before and after the HIV test [21]. Post-test counselling over the telephone can  
222 reduce maladaptive behaviours in case of the positive test [21].

223 The predictors for uptake of HIVST in our study were consistent with those in the literature  
224 [11,20,22]. Participants with multiple sex partners were more likely to have used HIVST, a  
225 finding which was similar to that in Tanzania [20]. The increased odds of HIVST among  
226 participants with multiple sex partners was plausible because the new partners may have to be  
227 tested at the point of sexual encounter. Our study was consistent with a study in Nigeria  
228 where young adults were less likely to have HIVST as they get older [22]. The increased  
229 likelihood of HIVST among younger people is likely because of higher sexual activity among  
230 younger people than their older counterparts. Similar to our study findings, previous studies  
231 have reported socio-demographic variables such as religion, program of study, and year of  
232 study to be associated with HIVST [11,20].

233

234

235

## 236 **Conclusion**

237 Young adults preferred HIV self-testing over the provider-based HIV testing in the health  
238 facility. Privacy, confidentiality and convenience were the most common reasons given for  
239 preferring HIVST over clinic-based HIV testing. The preference for clinic-based HIV testing  
240 was because of counselling and the perception that the results in the health facilities were  
241 credible, accurate, and trustworthy. HIVST was associated with having multiple sex partners,  
242 Muslim religion, students doing anaesthesia program and those in the fourth year of study.  
243 Addressing fears of test accuracy in the HIVST, and the lack of counselling can promote  
244 increased preference to use HIVST which has wider implications on uptake of HIV testing,  
245 linkage to care, viral load suppression and reduced AIDS-related mortality.

## 246 **Abbreviations**

247 HIV: Human Immunodeficiency syndrome; AIDS: Acquired immunodeficiency syndrome;  
248 HIVST: HIV self-testing; PLHIV: People living with HIV; HAART: Highly active  
249 antiretroviral therapy; CI: Confidence intervals; BNA: Bachelor of Anaesthesia; BSN;  
250 Bachelor of Science in Nursing; MBChB: Bachelor of Medicine and Surgery; MRRH: Mbale  
251 Regional Referral Hospital; REC.

## 252 **Consent for publication**

253 All authors have provided consent for publication

## 254 **Declaration of Competing Interest**

255 The authors declare no known competing interests.

## 256 **Funding**

257 There was no funding for the study.



## 258 **Availability of data and materials**

259 The datasets used and/or analyzed during the current study are available in the supplementary  
260 files.

## 261 **Author's contributions**

262 WN &JE participated in the conceptualization of the research idea, developed the study  
263 protocol, and obtained ethical clearance for the study. WN and GN participated in data  
264 collection and analysis. WN wrote the first draft of the manuscript while RCN, and JE reviewed  
265 the first draft of the manuscript. All the authors met the criteria for authorship and have  
266 approved the final draft for publication.

## 267 **Acknowledgment**

268 We thank the study participants and the faculty in the Department of Nursing, Busitema  
269 University for their respective roles in the implementation of this study. We thank Ms.  
270 Madeline Powers for editing the manuscript.

271

## 272 **References**

- 273 1. Uganda AIDS Commission; Ministry of Health & UNAIDS (2023). Uganda HIV & AIDS  
274 FactSheet (Based on data ending in December 2022).  
275 [https://uac.go.ug/index.php?option=com\\_sppagebuilder&view=page&id=24&Itemid=](https://uac.go.ug/index.php?option=com_sppagebuilder&view=page&id=24&Itemid=140)  
276 [140](https://uac.go.ug/index.php?option=com_sppagebuilder&view=page&id=24&Itemid=140). Last accessed on 01/06/2024.
- 277 2. Karim SSA, Baxter C (2019) HIV incidence rates in adolescent girls and young women in  
278 sub-Saharan Africa. *The Lancet Global Health* 7: e1470-e1471.
- 279 3. The United Nations. Department of Economic and Social Affairs Sustainable  
280 Development. The Sustainable Development Goals. <https://sdgs.un.org/goals>.  
281 Accessed on 9th February 2024. .
- 282 4. UNAIDS. Global AIDS Strategy 2021-2026 — End Inequalities. End AIDS.  
283 [https://www.unaids.org/en/resources/documents/2021/2021-2026-global-AIDS-](https://www.unaids.org/en/resources/documents/2021/2021-2026-global-AIDS-strategy)  
284 [strategy](https://www.unaids.org/en/resources/documents/2021/2021-2026-global-AIDS-strategy). Last accessed on 01st June 2024.
- 285 5. Ajayi AI, Awopegba OE, Adeagbo OA, Ushie BA (2020) Low coverage of HIV testing  
286 among adolescents and young adults in Nigeria: Implication for achieving the  
287 UNAIDS first 95. *PLoS One* 15: e0233368.

- 288 6. Giguère K, Eaton JW, Marsh K, Johnson LF, Johnson CC, et al. (2021) Trends in  
289 knowledge of HIV status and efficiency of HIV testing services in sub-Saharan  
290 Africa, 2000–20: a modelling study using survey and HIV testing programme data.  
291 *The Lancet HIV* 8: e284-e293.
- 292 7. Uganda Bureau of Statistics (UBOS) and ICF. 2018. Uganda Demographic and Health  
293 Survey 2016. Kampala, Uganda and Rockville, Maryland, USA: UBOS and ICF.
- 294 8. Nwaozuru U, Iwelunmor J, Ong JJ, Salah S, Obiezu-Umeh C, et al. (2019) Preferences for  
295 HIV testing services among young adults in Nigeria. *BMC Health Services Research*  
296 19: 1-9.
- 297 9. Hamilton A, Thompson N, Choko AT, Hlongwa M, Jolly P, et al. (2021) HIV self-testing  
298 uptake and intervention strategies among men in sub-Saharan Africa: a systematic  
299 review. *Frontiers in public health* 9: 594298.
- 300 10. Indravudh PP, Sibanda EL, d’Elbée M, Kumwenda MK, Ringwald B, et al. (2017) ‘I will  
301 choose when to test, where I want to test’: investigating young adults’s preferences for  
302 HIV self-testing in Malawi and Zimbabwe. *Aids* 31: S203-S212.
- 303 11. Segawa I, Bakeera-Kitaka S, Ssebambulidde K, Muwonge TR, Oriokot L, et al. (2022)  
304 Factors associated with HIV self-testing among female university students in Uganda:  
305 a cross-sectional study. *AIDS Research and Therapy* 19: 59.
- 306 12. Obiezu-Umeh C, Gbajabiamila T, Ezechi O, Nwaozuru U, Ong JJ, et al. (2021) Young  
307 adults’s preferences for HIV self-testing services in Nigeria: a qualitative analysis.  
308 *BMC public health* 21: 1-9.
- 309 13. Wachinger J, Kibuuka Musoke D, Oldenburg CE, Bärnighausen T, Ortblad KF, et al.  
310 (2021) “But I gathered my courage”: HIV self-testing as a pathway of  
311 empowerment among Ugandan female sex workers. *Qualitative health research* 31:  
312 443-457.
- 313 14. Harichund C, Moshabela M (2018) Acceptability of HIV self-testing in sub-Saharan  
314 Africa: scoping study. *AIDS and Behavior* 22: 560-568.
- 315 15. Inwani I, Chhun N, Agot K, Cleland CM, Rao SO, et al. (2021) Preferred HIV testing  
316 modalities among adolescent girls and young women in Kenya. *Journal of Adolescent*  
317 *Health* 68: 497-507.
- 318 16. Koris AL, Stewart KA, Ritchwood TD, Mususa D, Ncube G, et al. (2021) Youth-friendly  
319 HIV self-testing: Acceptability of campus-based oral HIV self-testing among young  
320 adult students in Zimbabwe. *PLoS One* 16: e0253745.
- 321 17. Iliyasu Z, Haladu ZA, Iliyasu BZ, Kwaku AA, Nass NS, et al. (2024) A Qualitative Study  
322 of HIV Testing Experiences and HIV Self-Testing Perspectives among Men in  
323 Northern Nigeria. *Nursing Research and Practice* 2024.
- 324 18. Aizobu D, Wada YH, Anyanti J, Omoregie G, Adesina B, et al. (2023) Enablers and  
325 barriers to effective HIV self-testing in the private sector among sexually active  
326 youths in Nigeria: A qualitative study using journey map methodology. *PLoS One* 18:  
327 e0285003.
- 328 19. Krause J, Subklew-Sehume F, Kenyon C, Colebunders R (2013) Acceptability of HIV  
329 self-testing: a systematic literature review. *BMC public health* 13: 1-9.
- 330 20. Vara PA, Buhulula LS, Mohammed FA, Njau B (2020) Level of knowledge,  
331 acceptability, and willingness to use oral fluid HIV self-testing among medical  
332 students in Kilimanjaro region, Tanzania: a descriptive cross-sectional study. *AIDS*  
333 *Research and Therapy* 17: 1-10.
- 334 21. Stevens DR, Vrana CJ, Dlin RE, Korte JE (2018) A global review of HIV self-testing:  
335 themes and implications. *AIDS and Behavior* 22: 497-512.

- 336 22. Iliyasu Z, Kassim RB, Iliyasu BZ, Amole TG, Nass NS, et al. (2020) Acceptability and  
337 correlates of HIV self-testing among university students in northern Nigeria.  
338 International journal of STD & AIDS 31: 820-831.
